# Supplementary material for: SIRT6 protects vascular smooth muscle cells from osteogenic transdifferentiation via Runx2 in chronic kidney disease
Source: J Clin Invest. 2022 Jan 4;132(1):e150051. doi: 10.1172/JCI150051 (PMC8718147; doi:10.1172/JCI150051)
Supplement: Supplemental data [file jci-132-150051-s083.pdf]

1 **SIRT6 protects vascular smooth muscle cell from osteogenic transdifferentiation via**

2 **Runx2 in chronic kidney disease**

3 Wenxin Li<sup>1</sup>; Weijing Feng<sup>2</sup>; Xiaoyan Su<sup>3</sup>; Dongling Luo<sup>1</sup>; Zhibing Li<sup>4</sup>; Yongqiao Zhou<sup>4</sup>;  
4 Yongjun Zhu<sup>1</sup>; Mengbi Zhang<sup>3</sup>; Jie Chen<sup>5</sup>; Baohua Liu<sup>6</sup>; Hui Huang<sup>1</sup>

5 1. Department of Cardiology, The Eighth Affiliated Hospital, Sun Yat-sen University,  
6 No.3025, Shennan Middle Road, Futian District Shenzhen 518000, China. 2. Department  
7 of Cardiology, State Key Laboratory of Organ Failure Research, Guangdong Provincial  
8 Key Lab of Shock and Microcirculation, Nanfang Hospital, Southern Medical University,  
9 Guangzhou 510280, China. 3. Nephropathy Department, Tungwah Hospital of Sun Yat-sen  
10 University Dongguan 523110, China. 4. Department of Cardiology, Sun Yat-sen Memorial  
11 Hospital, Sun Yat-sen University, Guangzhou 510120, China. 5. Department of Radiation  
12 Oncology, Sun Yat-sen Memorial Hospital, Sun Yat-sen University, Guangzhou 510120,  
13 China. 6. Shenzhen Key Laboratory for Systemic Aging and Intervention, National  
14 Engineering Research Center for Biotechnology (Shenzhen), Shenzhen University Health  
15 Science Center, Shenzhen, China

16  
17 **Address correspondence to:**

18 Professor Hui Huang  
19 Department of Cardiology  
20 The Eighth Affiliated Hospital  
21 Sun Yat-sen University  
22 No.3025, Shennan Middle Road  
23 Futian District Shenzhen 518000  
24 China  
25 huangh8@mail.sysu.edu.cn

26  
27 Athorship note: WL, WF, XS and DL are co–first authors.

28 Conflicts of interest: The authors have declared that no conflict of interest exists.

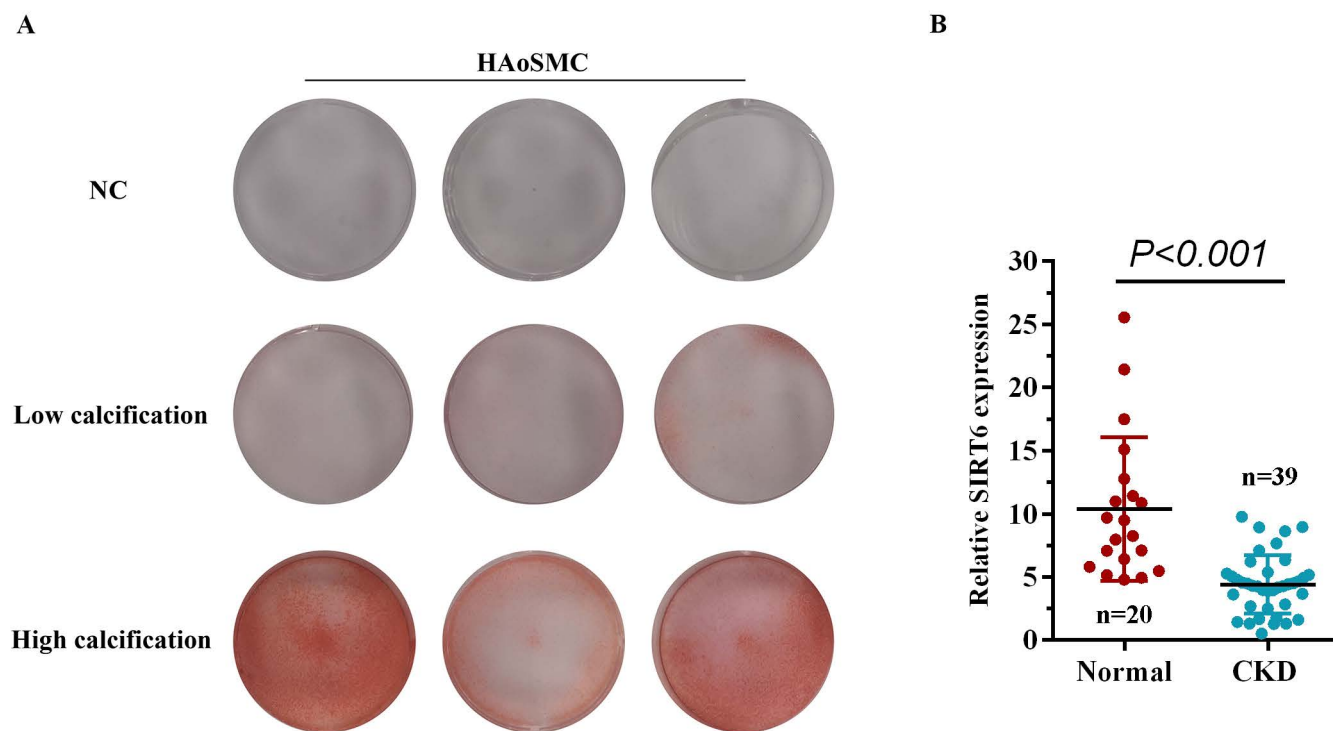

### Supplemental Figure 1

**A.** The HAoSMCs was incubated without or with Pi (1.0 mM and 3.0 mM) to induce different calcified status. HAoSMCs exhibited low calcification in 1.0 mM Pi while high calcification in 3.0 mM Pi. **B.** SIRT6 mRNA levels in PBMCs from normal people with (n = 20) and CKD patients (n=37). Data is expressed as mean  $\pm$  S.D., calculated using two-tailed t-test.

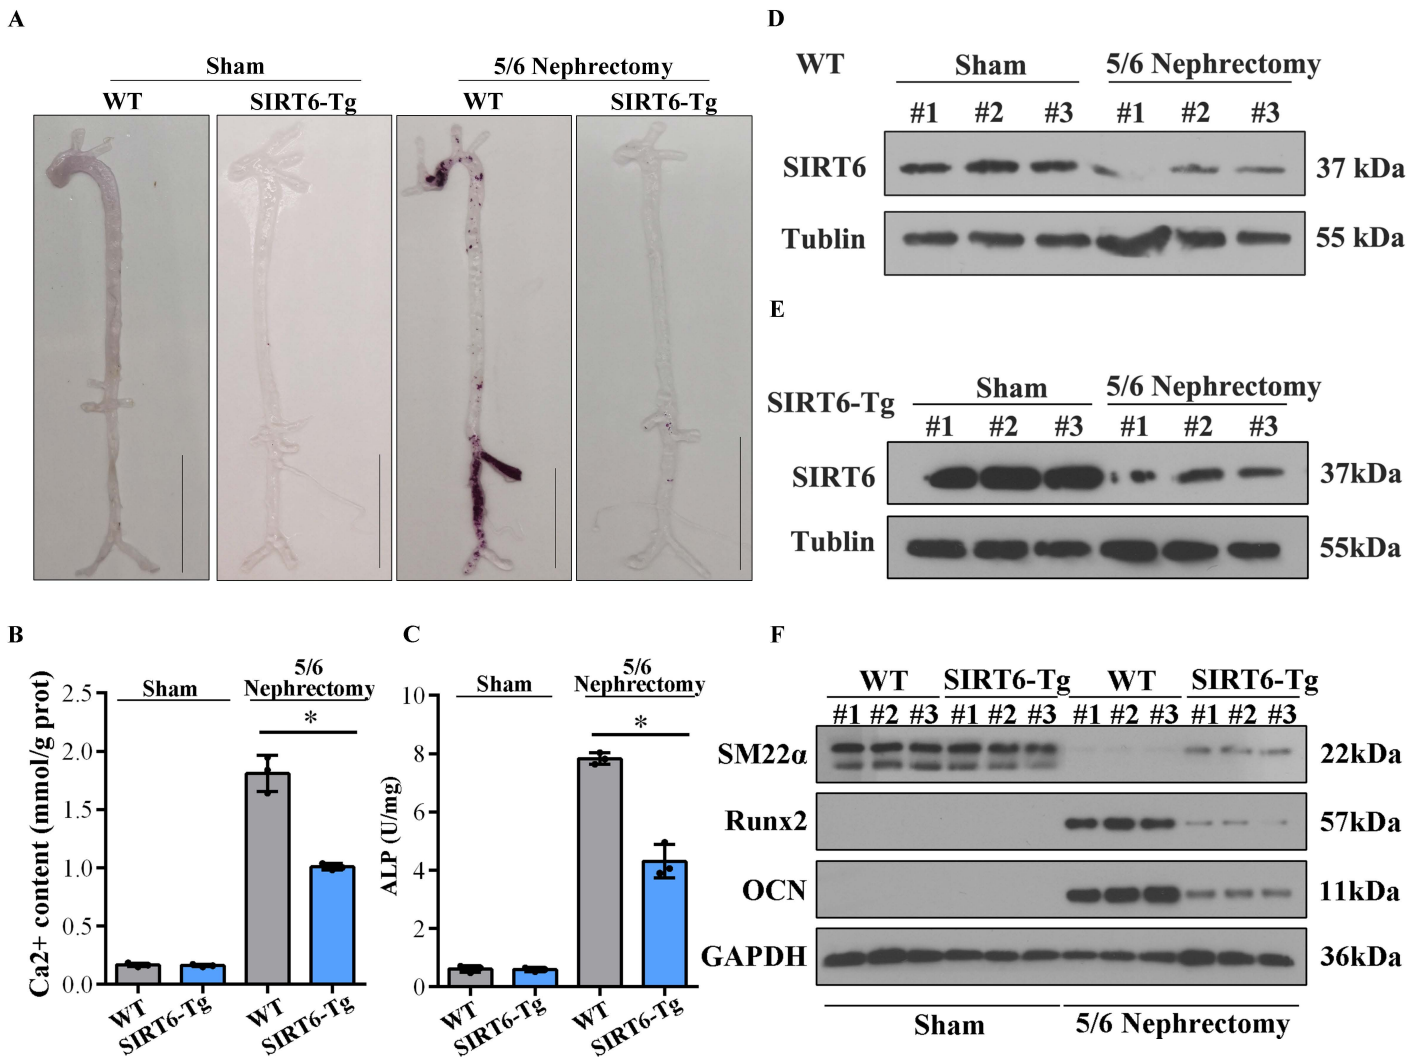

### Supplemental Figure 2

**A.** Alizarin red S images showing calcification in aortas of 5/6 nephrectomy CKD model. The calcification of aorta were shown in deep purple. Scale bars, 10 mm. **B, C.** The SIRT6 expression of aortas between sham and 5/6 nephrectomy CKD mouse model in WT and SIRT6-Tg mice. **D, E.** Calcium content (**D**) and ALP (**E**) were quantified in aortas tissue between sham and 5/6 nephrectomy CKD mouse model in WT and SIRT6-Tg mice. **F.** Analysis of osteogenic and contractile property factor expression of aortas tissue between sham and 5/6 nephrectomy CKD mouse model in WT and SIRT6-Tg mice by Western blot. Data are expressed as mean  $\pm$  SD., calculated using one-way ANOVA followed by Dunnett's test. \* $P < 0.05$ .

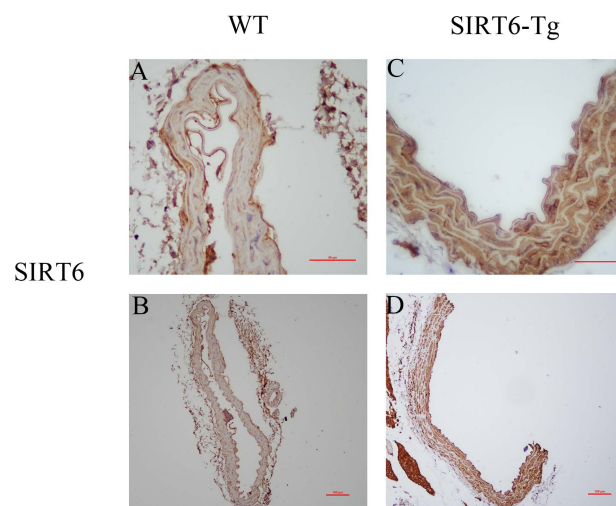

### Supplemental Figure 3

SIRT6 expression in aorta of WT (A, B) and SIRT6-Tg mouse (C, D) detected by IHC. Scale bars: A, C =100μm; B, D = 50μm.

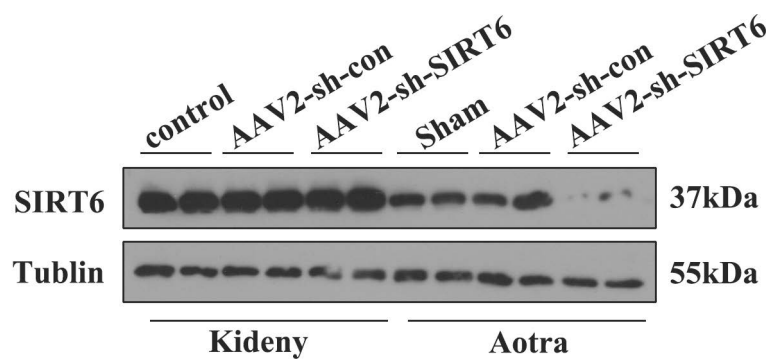

#### Supplemental Figure 4

WT mice were treated by AAV-sh-control and AAV-sh-SIRT6 for 4 weeks. Then the mice were sacrificed and collected aortas and kidneys. The SIRT6 expression among these groups were detected by Western blot to confirm the efficiency of AAV-sh-SIRT6 in aorta and kidney.

A

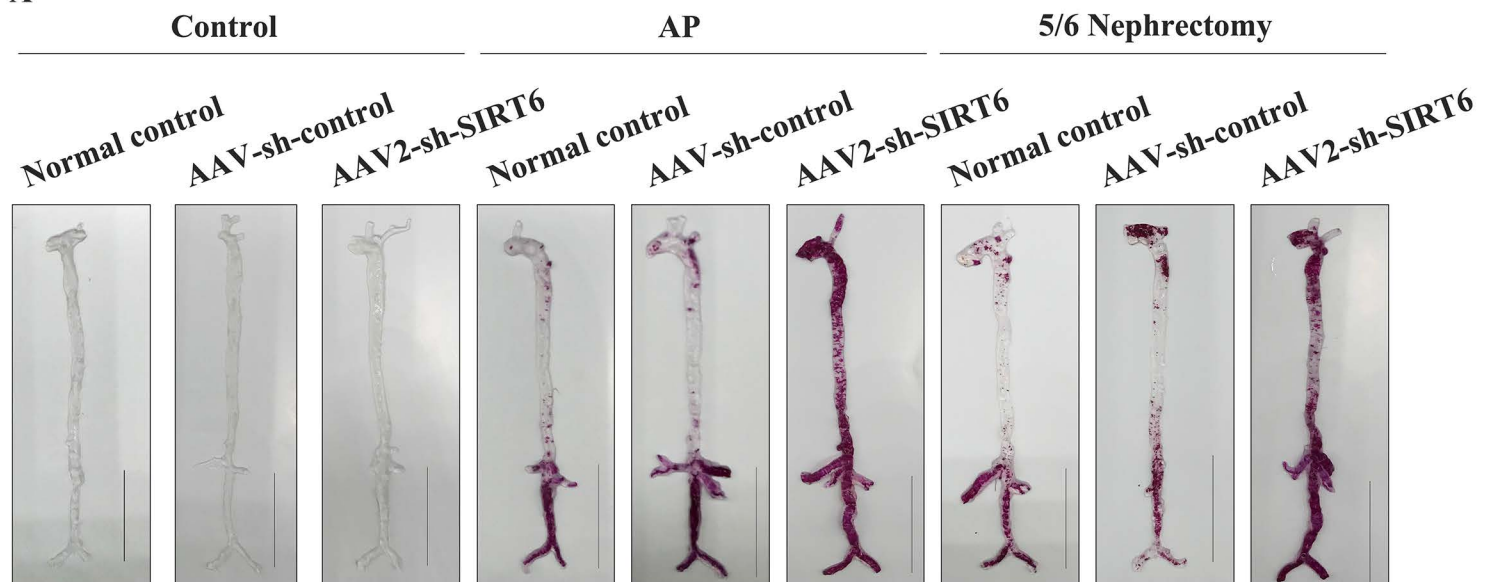

B

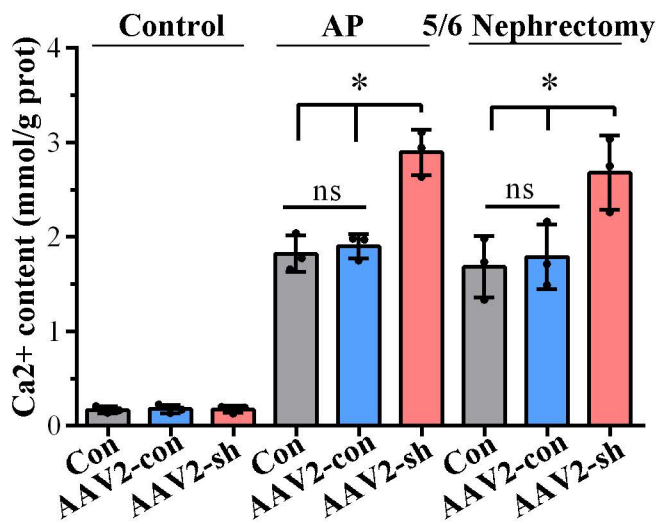

C

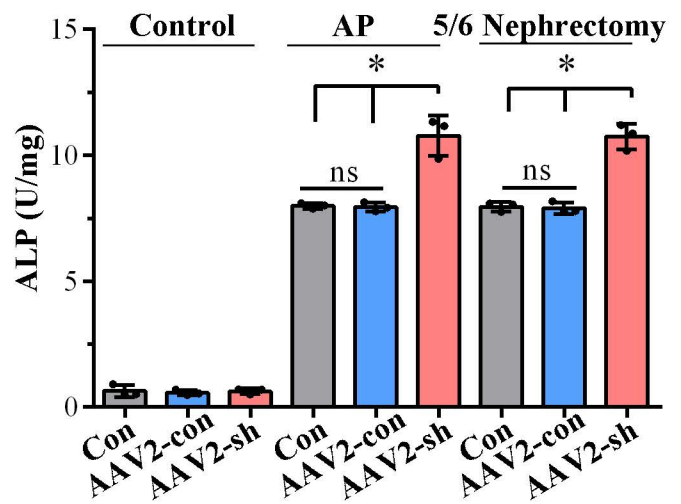

D

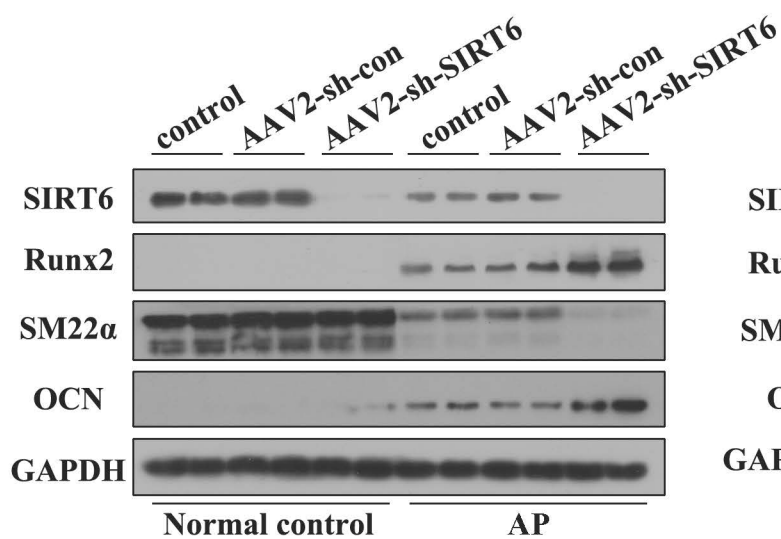

E

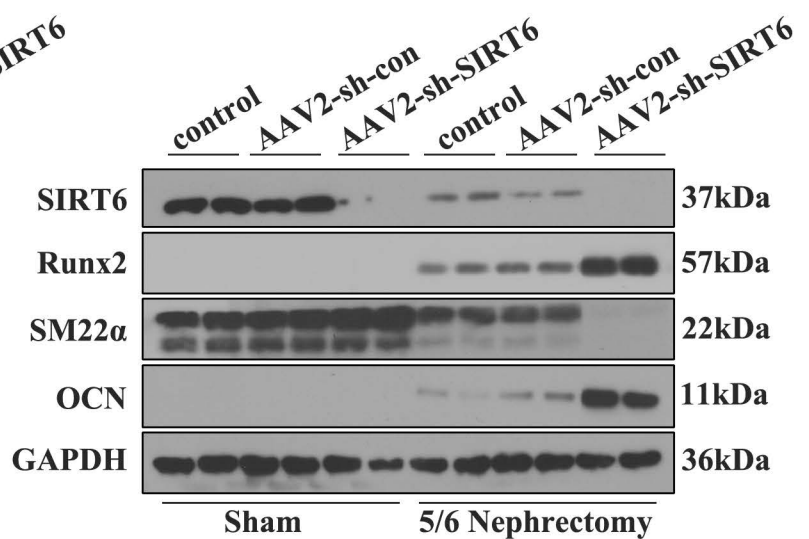

### **Supplemental Figure 5**

**A.** WT mice were treated by AAV-sh-control and AAV-sh-SIRT6 for 4 weeks. Then these mice were treated with adenine and phosphorus diet (AP) for 12 weeks, or performed 5/6 nephrectomy and fed with high phosphorus for another 8 weeks. Then the mice were sacrificed and collected aortas. Alizarin red S images showing calcification in aortas among these groups. The calcified parts of aorta were shown in deep purple. Scale bars, 10 mm. **B, C.** Calcium content (**B**) and ALP (**C**) were quantified in aortas tissue among these groups. **D, E.** Analysis of osteogenic and contractile property factor expression of aortas tissue among these groups by Western blot. Data are expressed as mean  $\pm$  SD., calculated using one-way ANOVA followed by Dunnett's test. \* $P < 0.05$ .

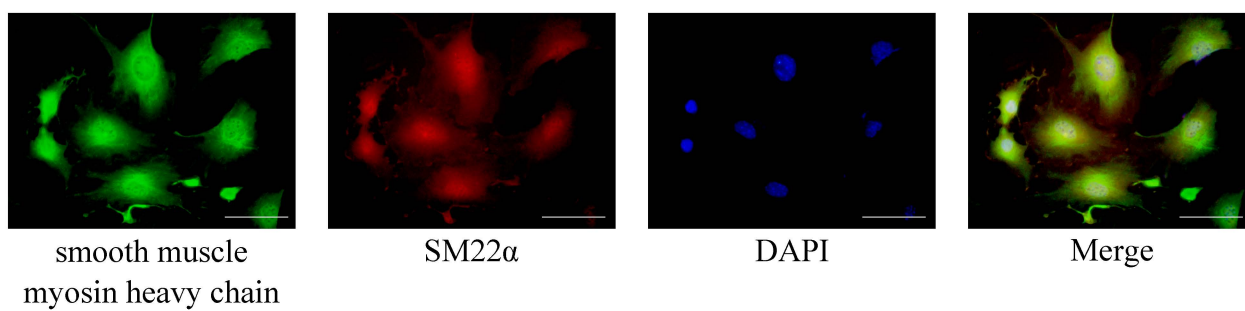

### Supplemental Figure 6

The primary cells isolated from mouse aorta was identified by VSMCs marker (smooth muscle myosin heavy chain and SM-22 $\alpha$ ) in IF. Scale bar, 50μm

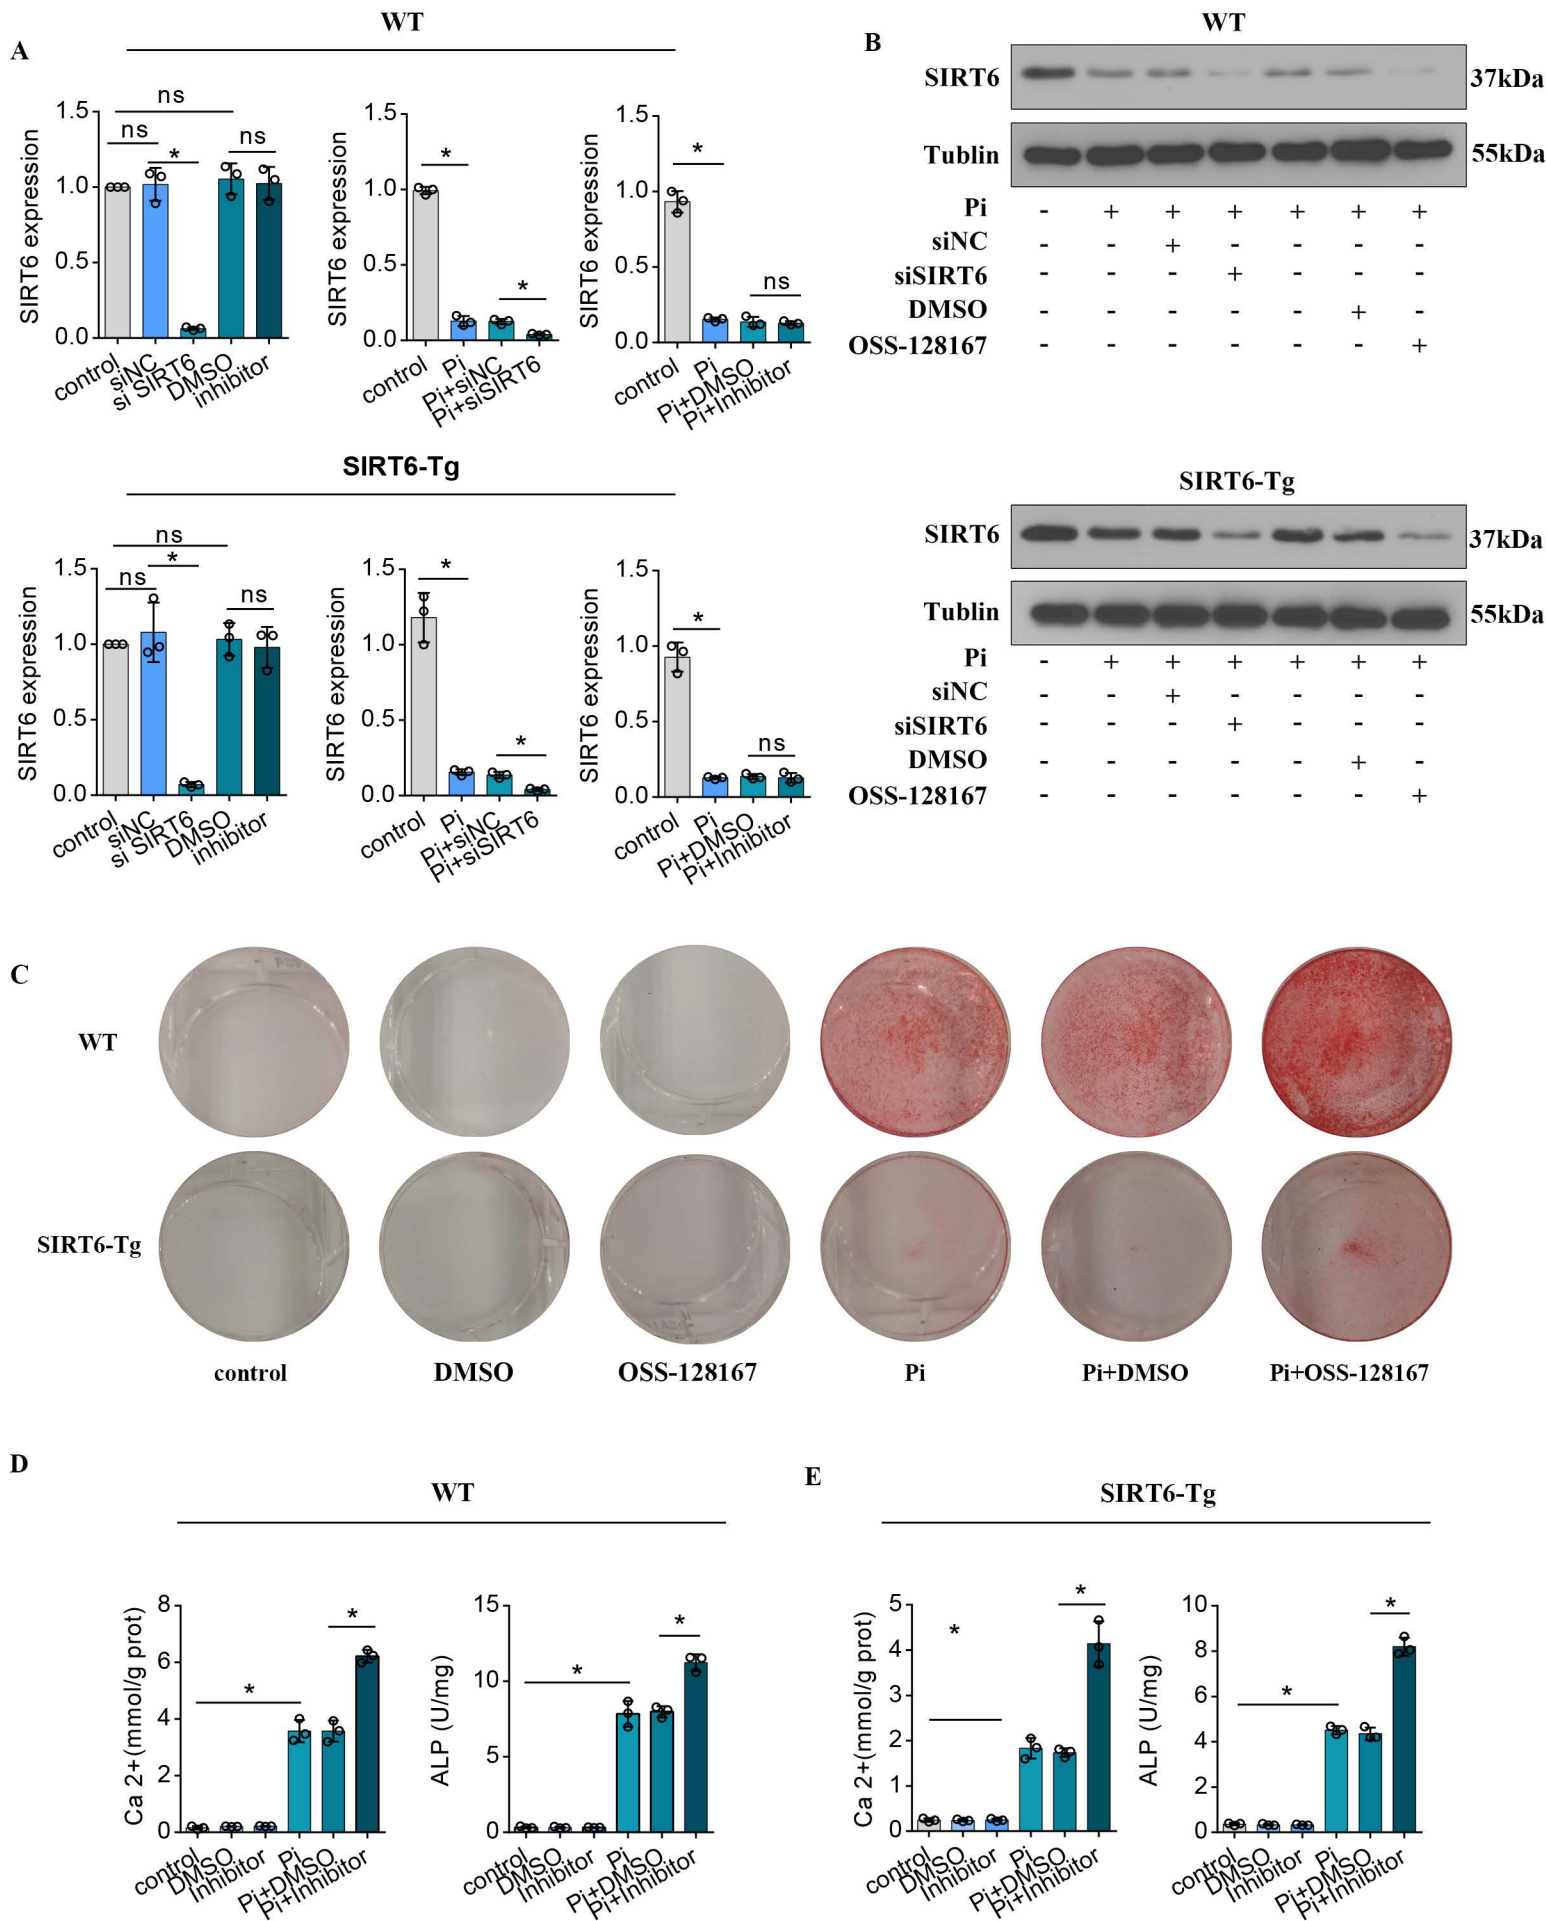

### **Supplemental Fig. 7**

**A, B.** WT and SIRT6-Tg VSMC were pre-transfected with siSIRT6 or si-negative control (siNC) and then exposed to Pi for 7 days; The VSMC was incubated with Pi together with DMSO or OSS-128167 for 7 days. The SIRT6 expression were analyzed by qPCR (**A**), and the cells extracts were immunoblotted for the indicated proteins (**B**). **C-E.** WT and SIRT6-Tg VSMC were incubated with Pi together with DMSO or OSS-128167 for 7 days. The VSMC was stained for mineralization by Alizarin red S (**C**), and the quantitative analysis of calcium content and ALP (**D-E**) were detected respectively. Statistical significance was assessed using one-way ANOVA followed by Dunnett's test and is presented as follows: \* $P < 0.05$ . All values are means  $\pm$  S.D.

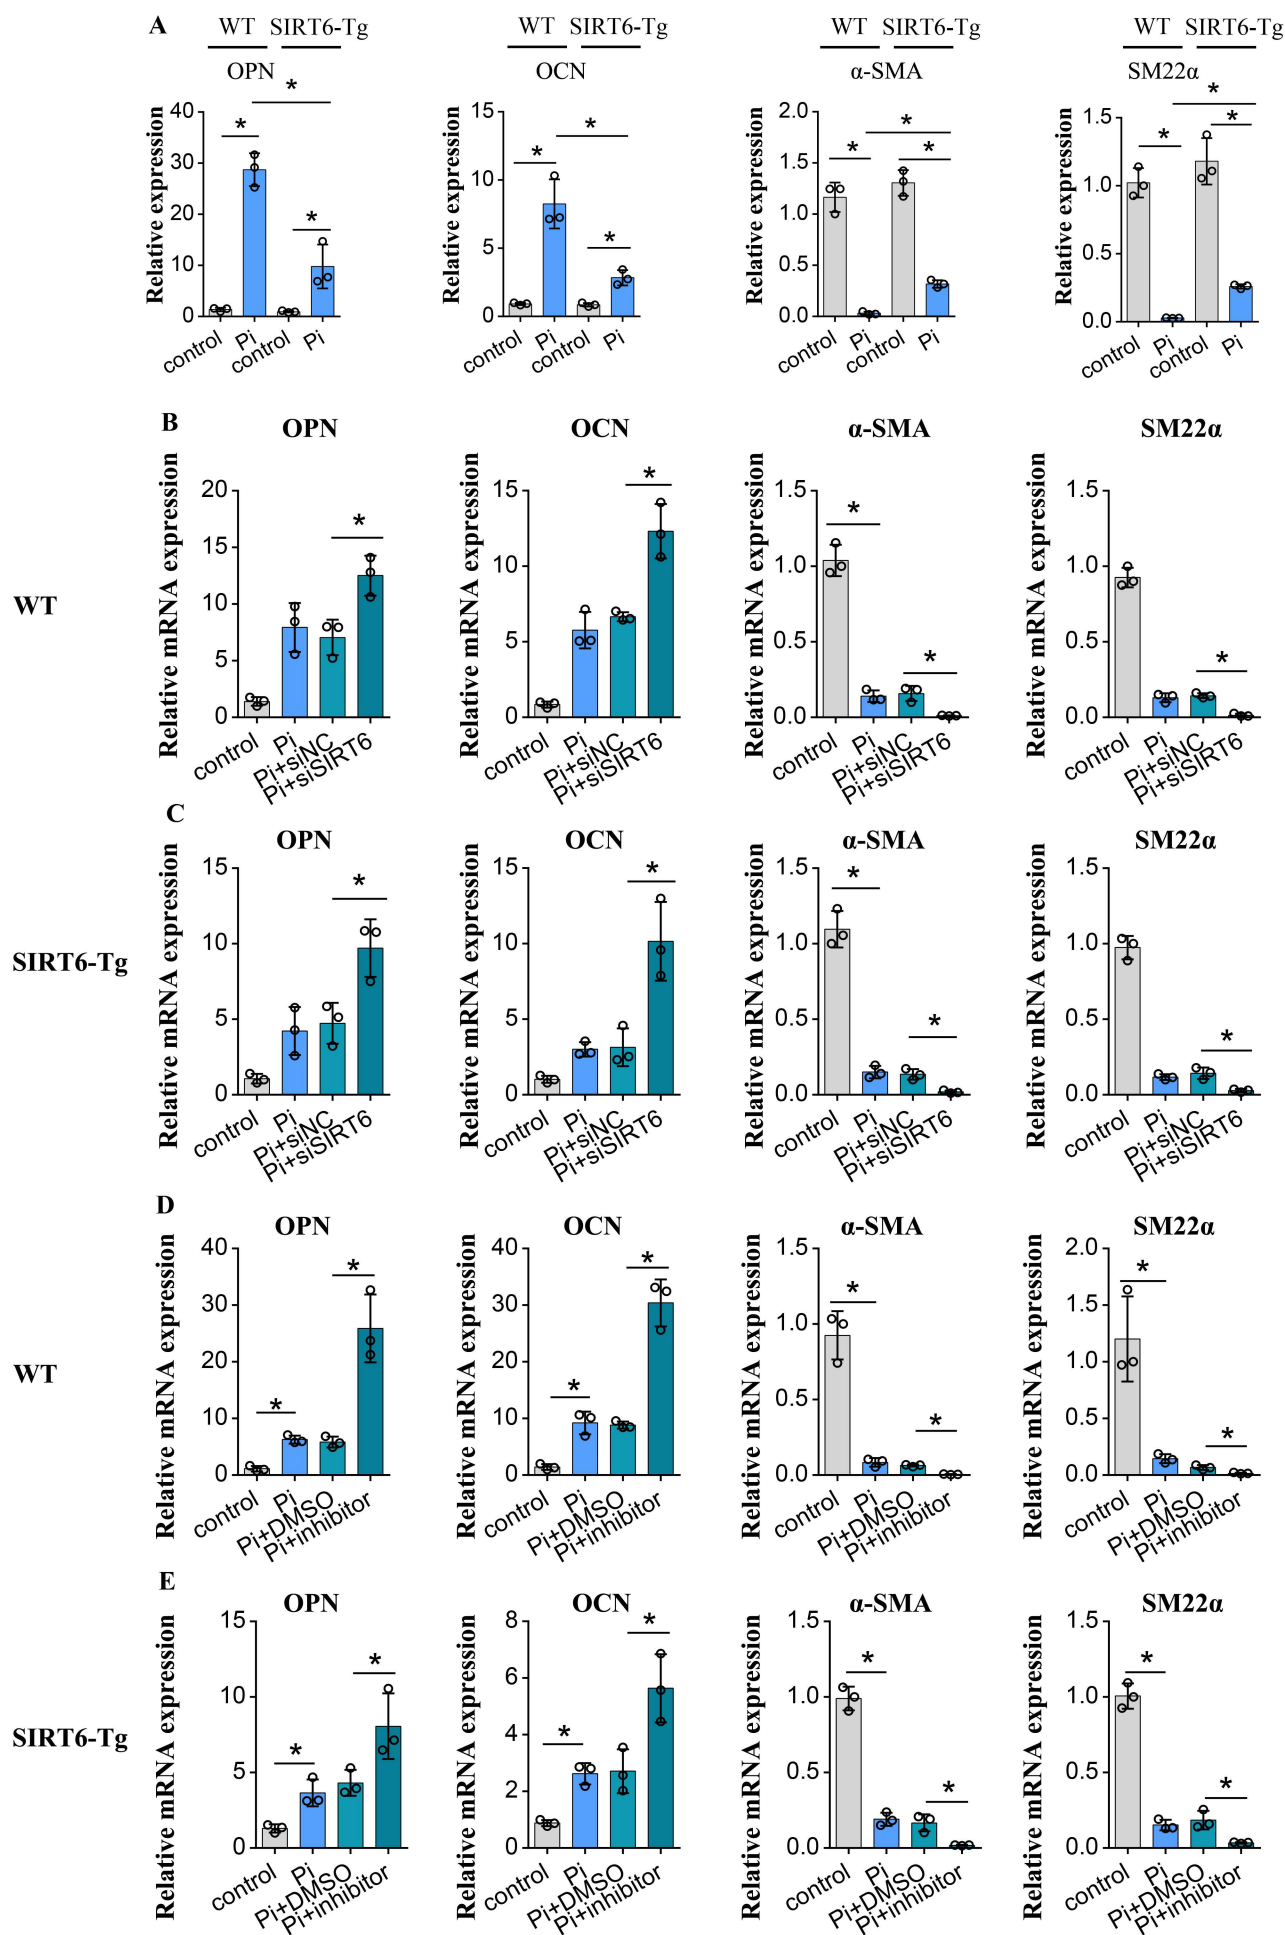

### **Supplemental Figure 8**

**A.** Analysis of osteogenic and contractile property factor expression in WT and SIRT6-Tg VSMCs after Pi treatment by qPCR. **B-E.** The VSMC was pre-transfected with siSIRT6 or siNC together with Pi for 7 days, and the downstream osteogenic markers (OPN, OCN) and the contractile property marker ( $\alpha$ -SMA, SM-22 $\alpha$ ) were analyzed by qPCR (**B, C**); VSMC was incubated with DMSO or OSS-128167 together with Pi for 7days and the same markers like above were analyzed by qPCR (**D, E**). Statistical significance was assessed using one-way ANOVA followed by Dunnett's test and is presented as follows: \*P < 0.05. All values are means  $\pm$  S.D.

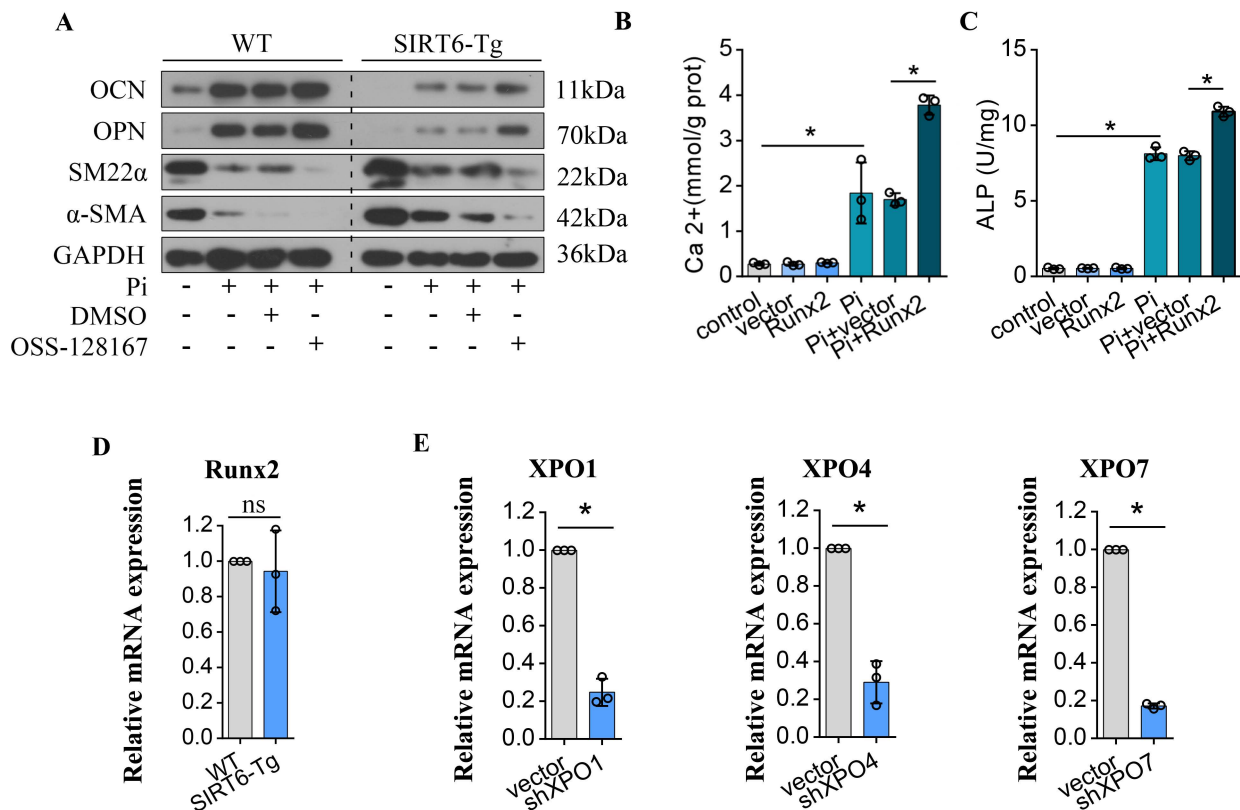

### Supplemental Figure 9

**A.** VSMCs were incubated with DMSO or OSS-128167 (0.1mM), a SIRT6 specific inhibitor, together with Pi (3.0mM) for 7days and the osteogenic and contractile property markers were analyzed by Western blot. **B-C.** SIRT6-Tg VSMCs were pre-transfected with Runx2 plasmid or vector plasmid, and then exposed to Pi (3.0mM) for 7 days. Calcium content (**B**) and ALP (**C**) were quantified in the VSMCs. **D.** The VSMC was incubated with Pi for 7 days, then the mRNA level of Runx2 was detected through qPCR. **E.** SIRT6-Tg VSMC was transfected with shRNA targeting XPO1, XPO4, XPO7, or their vector negative control shRNA. The relative expression of XPO1, XPO4, XPO7 were analyzed by qPCR. Statistical significance was assessed using one-way ANOVA followed by Dunnett's test (**B-C**) and two-tailed t-test for two groups (**D-E**) and is presented as follows: \* $P < 0.05$ . All values are means  $\pm$  S.D.

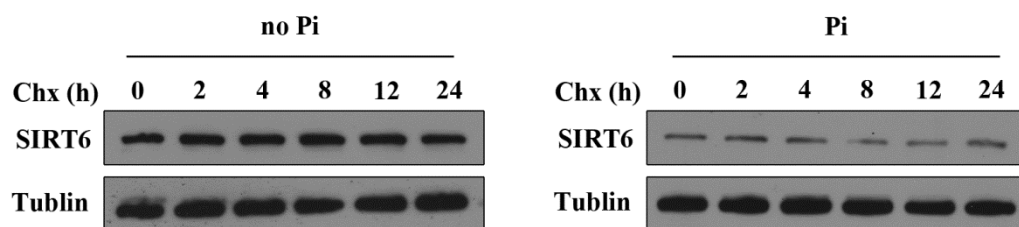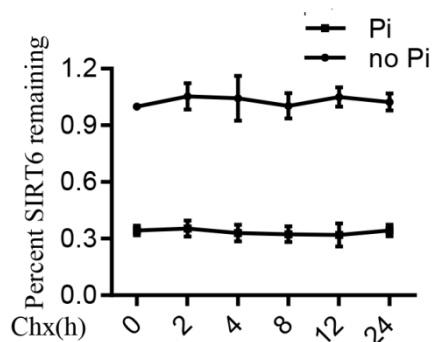

### Supplemental Figure 10

WT VSMCs were treated with Pi for 7 days and incubated with the protein translation inhibitor CHX (0.2mM) for the indicated times before harvest, followed by immunoblotting with the anti-SIRT6 antibody and anti-Tublin anti-body. The curve shows the stability of SIRT6 protein (The SIRT6 protein of Pi group were normalized by no Pi group ).

**A**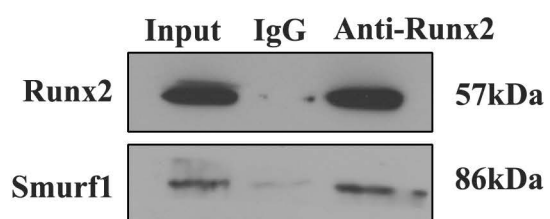**B**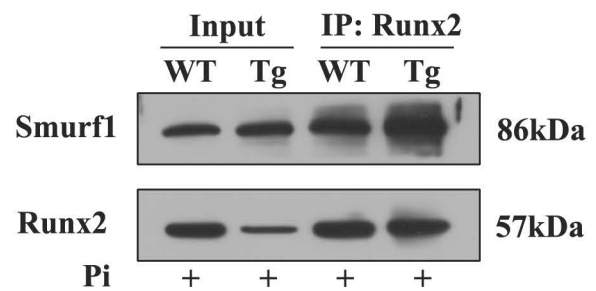**Supplemental Figure 11**

**A.** Anti-Runx2 IP followed by WB with anti-Runx2 or anti-Smurf1 antibody in WT VSMCs after treatment with Pi for 7days. Anti-rabbit IgG IP was used as a negative control. **B.** Anti-Runx2 IP in WT and SIRT6-Tg VSMCs after treatment with Pi for 7days. WB was carried out with anti-Runx2 and anti-Smurf1 antibody. Anti-rabbit IgG IP was used as a negative control.

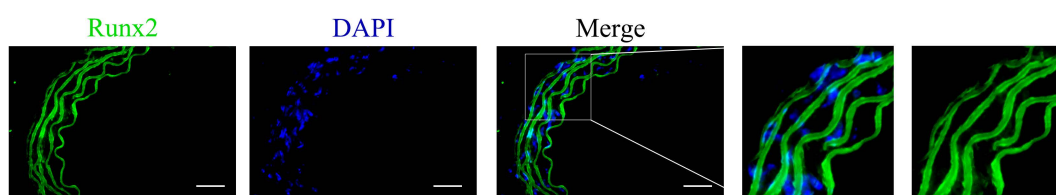

### Supplemental Figure 12

The aortas slides were incubated with anti-rabbit-FITC antibody for 1h at room temperature. Nuclei were counterstained with DAPI. Prolong Gold antifade reagent was used to decrease fluorescence quenching of the slides. The elastic fibers are fluorescing. The picture shown as a negative control for IF staining. Scale bar, 50 $\mu$ m

**Supplemental Table1: The Primers of Relative Genes in this work**

| Gene Name                       | Primers                   |
|---------------------------------|---------------------------|
| hSIRT1 Forward(5'- 3')          | GGAGCAGATTAGTAGGCGGC      |
| hSIRT1 Reverse(5'- 3')          | ACCTCAGCGCCATGGAAAAT      |
| hSIRT2 Forward(5'- 3')          | TCCTGCGGAACTTATTCTCCC     |
| hSIRT2 Reverse(5'- 3')          | GATGGTTGGCTTGAAGTGCC      |
| hSIRT3 Forward(5'- 3')          | CCCAGTGGCATTCCAGACTT      |
| hSIRT3 Reverse(5'- 3')          | AAGGGCTTGGGGTTGTGAAA      |
| hSIRT4 Forward(5'- 3')          | CTCGAAAGCCTCCATTGGGT      |
| hSIRT4 Reverse(5'- 3')          | GGCCAGCCTACGAAGTTTCT      |
| hSIRT5 Forward(5'- 3')          | AGGAAAAGGGTGTGAAGAGGC     |
| hSIRT5 Reverse(5'- 3')          | GGAAGTGCCCACTAGAC         |
| hSIRT6 Forward(5'- 3')          | ACGCAGTACGTCAGAGACAC      |
| hSIRT6 Reverse(5'- 3')          | GTTGACAATGACCAGACGGC      |
| mSIRT6 Forward(5'- 3')          | CACAAAACATGACCGCCAGG      |
| mSIRT6 Reverse(5'- 3')          | CTGCACCATTGAGATGCACG      |
| hSIRT7 Forward(5'- 3')          | CTTGGTCGTCTACACAGGCG      |
| hSIRT7 Reverse(5'- 3')          | GGTGATGCTCATGTGGGTGA      |
| mRunx2 Forward(5'- 3')          | ATCCCCATCCATCCACTCCA      |
| mRunx2 Reverse(5'- 3')          | GGGGTGTAGGTAAAGGTGGC      |
| mSM22 $\alpha$ Forward(5'- 3')  | GGTCCATCCTACGGCATGAG      |
| mSM22 $\alpha$ Reverse(5'- 3')  | TGCTCCTGGGCTTTCTTCATA     |
| m $\alpha$ -SMA Forward(5'- 3') | GTACCACCATGTACCCAGGC      |
| m $\alpha$ -SMA Reverse(5'- 3') | GCTGGAAGGTAGACAGCGAA      |
| mOCN Forward(5'- 3')            | GGTAGTGAACAGACTCCGGC      |
| mOCN Reverse(5'- 3')            | TTAAGCTCACACTGCTCCCG      |
| mOPN Forward(5'- 3')            | CCTGGCTGAATTCTGAGGGAC     |
| mOPN Reverse(5'- 3')            | CAGTCACTTTCACCGGGAGG      |
| mXPO1 Forward(5'- 3')           | TGAACACGAAATACTATGGACTACA |
| mXPO1 Reverse(5'- 3')           | CTGGTCCTACTCGCTCCAAC      |
| mXPO4 Forward(5'- 3')           | AAAAGGGCAGCATCGAGTCA      |
| mXPO4 Reverse(5'- 3')           | TGCCACTACTTATCAACTGGCT    |
| mXPO7 Forward(5'- 3')           | CAAAGCTGGGCTGGTTTGAC      |
| mXPO7 Reverse(5'- 3')           | AGTTGTGTCTGCTTGATTAATTCA  |

**Supplementary Table 2 : The Relative siRNA and shRNA in this work**

| Gene name   | Relative sequences (5' - 3')                                    |
|-------------|-----------------------------------------------------------------|
| SIRT6 siRNA | CATGTTTCGTATAAGTCCAA                                            |
| XPO1 shRNA  | CCGGGATTATGTAGATACGGAAATACTCGAGTATTTCCG<br>TATCTACATAATCTTTTTTG |
| XPO4 shRNA  | CCGGGCTACCTCTTAGCTGATGATACTCGAGTATCATCAG<br>CTAAGAGGTAGCTTTTTG  |
| XPO7 shRNA  | CCGGCCCTGATGTTATCCGATTGATCTCGAGATCAATCGG<br>ATAACATCAGGGTTTTTG  |

**Supplementary Table 3 :The antibodies used in this study**

|                          |                          |                                                  |
|--------------------------|--------------------------|--------------------------------------------------|
| Anti-SIRT6               | Abcam #ab191385          | WB 1:1000; IHC/IF 1:200; IP: 5µl for 1mg protein |
| Anti-Runx2               | Abcam #ab76956           | WB 1:1000; IF 1:200                              |
| Anti-Runx2               | CST #12556s              | IP: 5µl for 1mg protein                          |
| Anti-α-SMA               | Abclonal #A17910         | WB 1:1000; IF 1:200                              |
| Anti-SM22α               | Proteintech #10493-1-AP  | WB 1:1000; IF 1:200                              |
| Anti-OCN                 | Proteintech #23418-1-AP  | WB 1:1000; IF 1:200                              |
| Anti-OPN                 | Proteintech #22952-1-AP  | WB 1:1000; IF 1:200                              |
| Anti-XPO1                | Abcam #ab180144          | WB 1:1000; IP: 5µl for 1mg protein               |
| Anti-HA                  | CST #3724S               | WB 1:1000; IP: 5µl for 1mg protein               |
| Anti-Flag                | CST #14793S              | WB 1:1000; IP: 5µl for 1mg protein               |
| Anti-Ub                  | CST #43124S              | WB 1:1000                                        |
| Anti-Acetylated-lysine   | CST #9441S               | WB 1:1000                                        |
| Anti-Smurf1              | Affinity #DF7713         | WB 1:1000                                        |
| Anti-Histone3            | Abclonal #A2352          | WB 1:1000                                        |
| Anti-GAPDH               | Proteintech # 60004-1-Ig | WB 1:1000                                        |
| Anti-tublin              | Proteintech #11224-1-AP  | WB 1:1000                                        |
| Anti-β-actin             | Proteintech #66009-1-Ig  | WB 1:1000                                        |
| Anti-rabbit- FITC        | Sigma # F9887            | IF: 1:2000                                       |
| Anti-mouse-Alexa Flu-647 | Abcam # ab150115         | IF: 1:2000                                       |
| Anti-rabbit              | CWBIO # CW0103           | WB: 1:10000                                      |
| Anti-mouse               | CWBIO # CW0102           | WB: 1:10000                                      |
| IgG                      | CST #2729                | IP: 2µl for 1mg protein                          |
